# Supplementary material
Source: PubMed Central journal article supplement (PMC3073415)
Supplement: NIHMS277832-supplement-Supp_Data.pdf [file NIHMS277832-supplement-Supp_Data.pdf]

# European Journal of Immunology

**Supporting Information**

**for**

**DOI 10.1002/eji.201040649**

**Interferon- $\alpha$  induces unabated production of short-lived plasma cells in pre-autoimmune lupus-prone (NZB  $\times$  NZW)F1 mice but not in BALB/c mice**

Alexis Mathian, Mike Gallegos, Virginia Pascual, Jacques Banchereau  
and Sophie Koutouzov

## Supporting Information

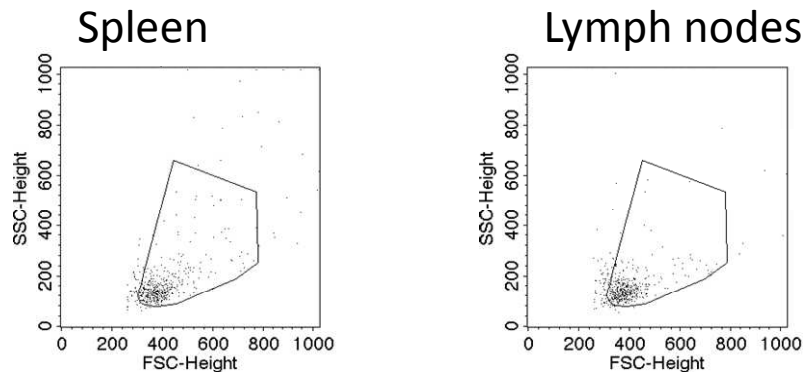

**Supplemental Figure 1. Gates used to analyze spleen and lymph nodes cells by FACS**

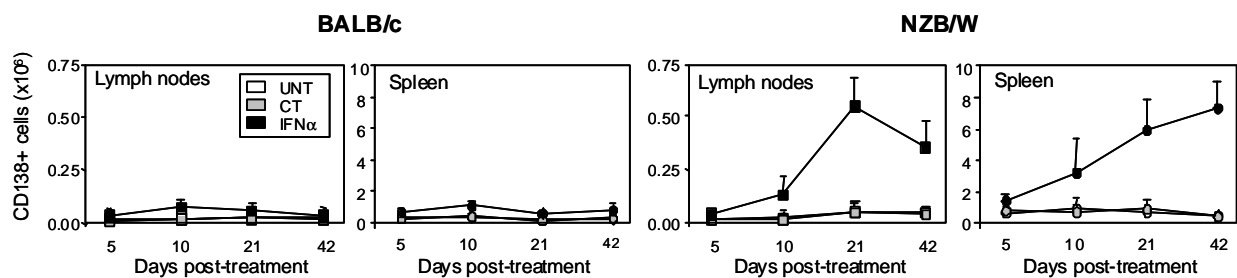

**Supplemental Figure 2. Number of B220<sup>lo</sup>CD138<sup>+</sup> cells in spleens and lymph nodes of NZB/W and BALB/c mice**

FACS with an antibody to CD138, a marker of ASCs, was used to examine the effect of IFN $\alpha$  on the numbers of CD138<sup>+</sup> cells in the spleen and in lymph nodes of NZB/W and BALB/c mice. Spleen and lymph node cells from mice sacrificed at indicated times after initiation of treatment were stained with fluorescent Abs, and absolute numbers of B220<sup>lo</sup>CD138<sup>+</sup> cells determined by multiplying the frequency obtained by FACS by the spleen absolute cell numbers. Results are the means  $\pm$  SD of 3 to 5 independent experiments. Expression of IFN $\alpha$  caused a dramatic increase in the absolute number of CD138-positive cells in both tissues in NZB/W but not BALB/c mice. UNT, untreated; CT, CT Adv-treated; IFN $\alpha$ , IFN $\alpha$  Adv-treated.

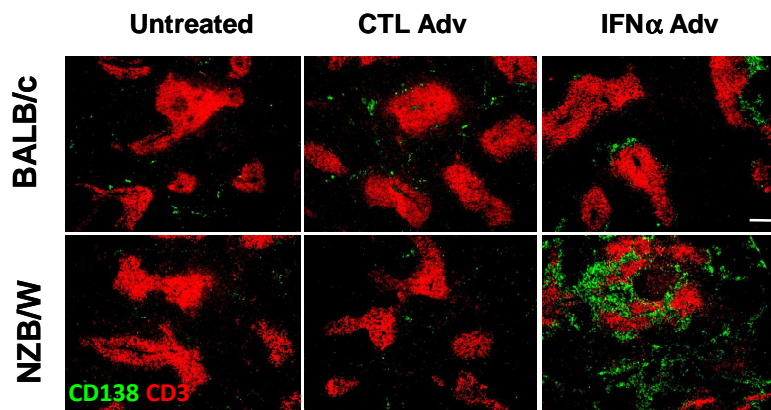

**Supplemental Figure 3. High numbers of CD138<sup>+</sup> cells are localized in the spleens of IFN $\alpha$ -treated NZB/W mice**

Immunofluorescent staining of plasma cells on spleen sections from IFN $\alpha$ -treated NZB/W mice for CD138 (green) and CD3 (red). At day 23 post-treatment, high numbers of CD138<sup>+</sup> plasma cells were detected in the spleen sections of IFN $\alpha$ -treated NZB/W mice but not in control mice. Note that CD138<sup>+</sup> plasma cells were scattered in both the red pulp and in the white pulp within the T-cell zone. This was not observed in the spleens of control mice or in the spleens of control or IFN $\alpha$  Adv-treated BALB/c mice. Bars, 100  $\mu$ m (magnification, x10).

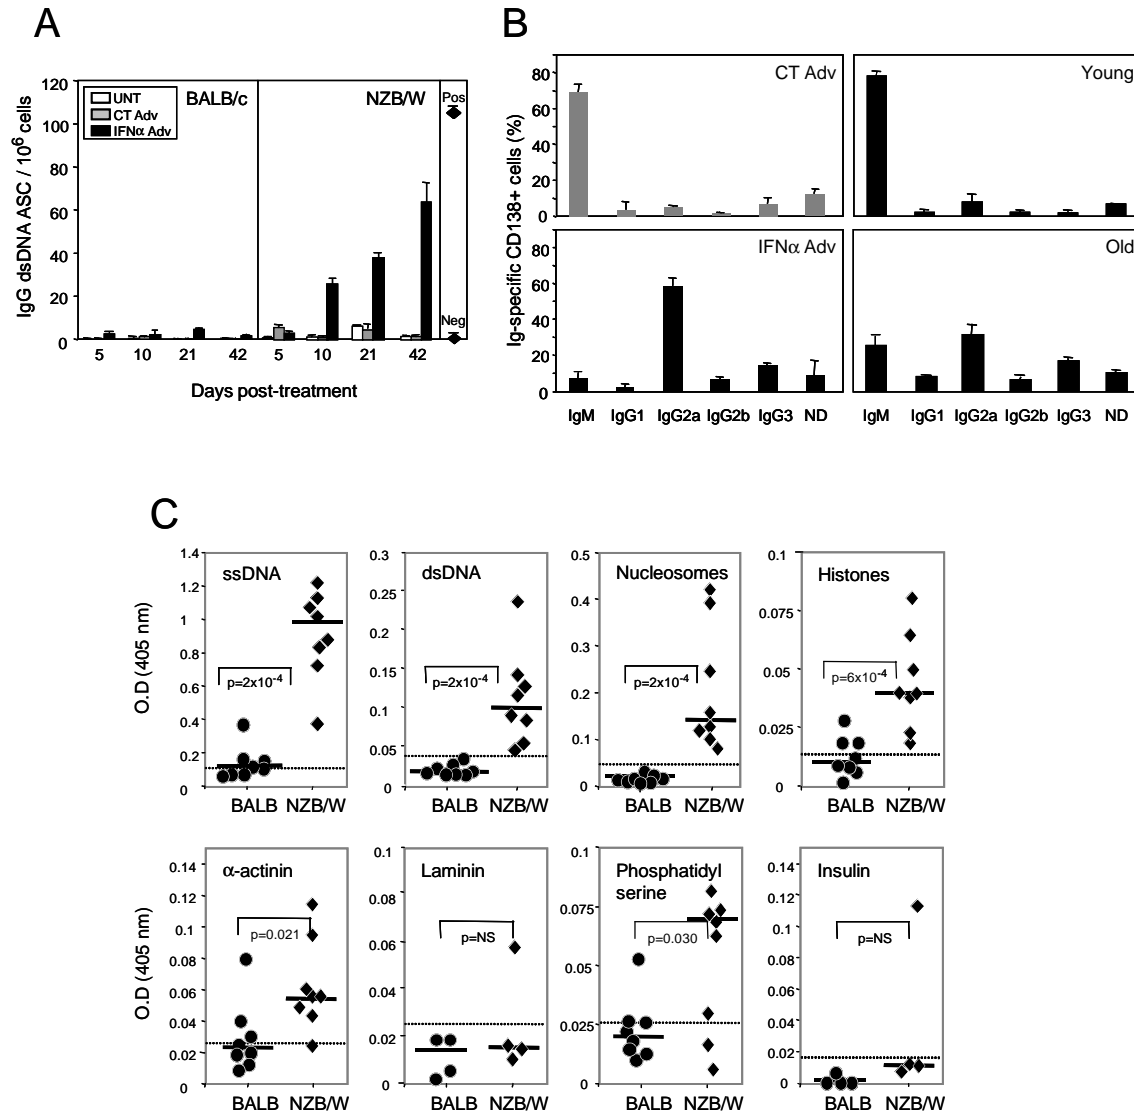

#### Supplemental Figure 4. Characteristics of IFN $\alpha$ -induced ASCs.

(A) Kinetics of spleen IgG anti-dsDNA ASC production as determined by ELISPOT. The right panel shows the frequency of IgG anti-dsDNA ASCs in the spleen of young untreated NZB/W mice (neg) and old, proteinuric untreated NZB/W mice (pos). Results are the mean  $\pm$  SD of pools of 3 mice in each group in two independent experiments. (B) Pattern of intracellular Ig class and sub-class in B220 $^{lo}$ CD138 $^+$ -gated spleen cells from CT Adv- or IFN $\alpha$  Adv-treated NZB/W young and old, proteinuric NZB/W mice. Cells were stained intracellularly with fluorescent anti-Ig Abs, and the frequency for Ig class and subclass was analyzed by FACS. ND indicates B220 $^{lo}$ CD138 $^+$  cells negative for the studied Abs. Results are the means  $\pm$  SD of 3 mice per experimental group. (C) IFN $\alpha$ -induced autoantibody reactivity in serum from BALB/c and NZB/W mice was analyzed by ELISA at day 21 post-treatment. Each dot represents an individual mouse. Solid lines represent the median OD. Dashed lines represent the OD value beyond which mice are considered positive (mean OD + 3 SD of sera from CT Adv-treated NZB/W and BALB/c mice).

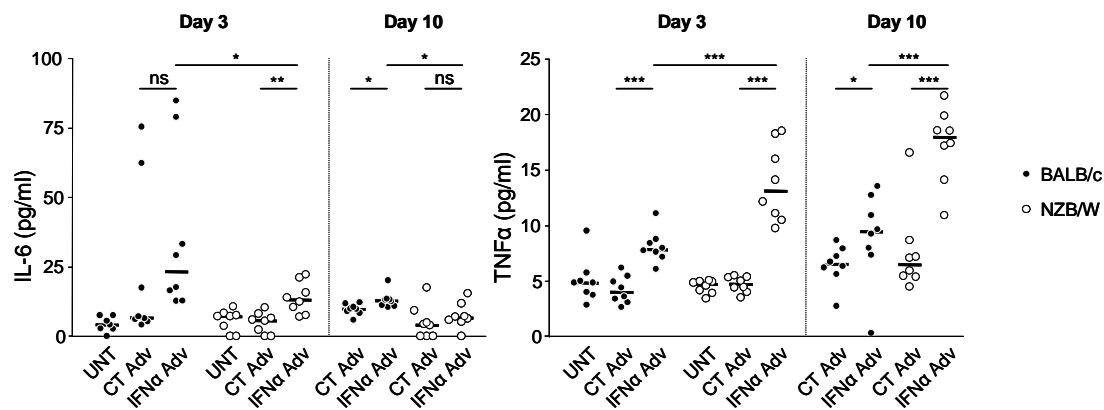

**Supplemental Figure 5. In vivo Adv-mediated delivery of mIFN $\alpha$  induces expression of IL-6 and TNF- $\alpha$  in the sera of Balb/c and NZB/W mice.**

Ten-week-old BALB/c (filled) and NZB/W mice (open) were injected with  $1 \times 10^{10}$  control-Adv or IFN $\alpha$ -Adv viral particles. Mice were bled at days 3 and 10 post-treatment, and IL-6 and TNF- $\alpha$  serum levels were measured by ELISA. Each dot represents an individual mouse, and lines show median values. Comparisons were made using the Mann-Whitney U test. ns, not significant; \*,  $p < 0.05$ ; \*\*,  $p < 0.01$ ; \*\*\*  $p < 0.001$ .

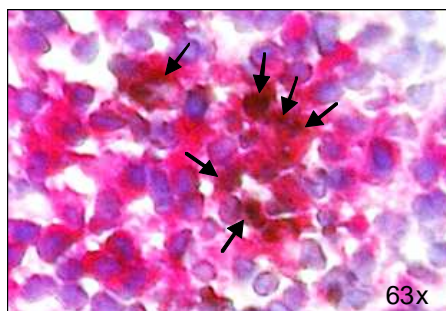

**Supplemental Figure 6. In situ apoptosis of spleen cells**

Spleen sections of IFN $\alpha$ -treated NZB/W mice were stained for apoptotic CD138<sup>+</sup> cells using TUNEL at day 48 post-treatment. TUNEL-stained nuclei appear brown, and CD138<sup>+</sup> cells appear magenta. Numerous apoptotic CD138<sup>+</sup> cells were present (arrows). At day 48 after initiation of IFN $\alpha$  treatment,  $7.2 \pm 3.7\%$  of splenic CD138<sup>+</sup> cells were apoptotic (vs.  $2.6 \pm 2.0\%$  in CT Adv-treated mice; data not shown). Results are representative of 6 individual mice.

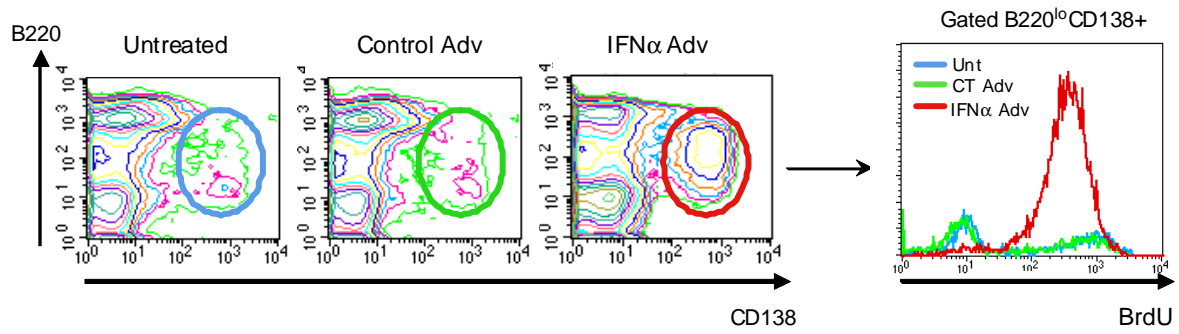

**Supplemental Figure 7. FACS of plasma cells.**

Untreated, CT Adv-treated, or IFN $\alpha$  Adv-treated NZB/W mice (at day 0) were fed BrdU for different 14-day periods at the end of which mice were sacrificed and spleen cells analyzed by flow-cytometry. Spleen cells were stained for intracellular BrdU, and BrdU staining of gated B220<sup>lo</sup>CD138<sup>+</sup> cells was analyzed by flow-cytometry as illustrated.
